# Supplementary material for: Autonomic dysfunction and risk of severe hypoglycemia among individuals with type 2 diabetes
Source: JCI journal article supplement (doi:10.1172/jci.insight.156334), 2022-11-01
Supplement: sd1 [file 1]

## DATA SUPPLEMENT

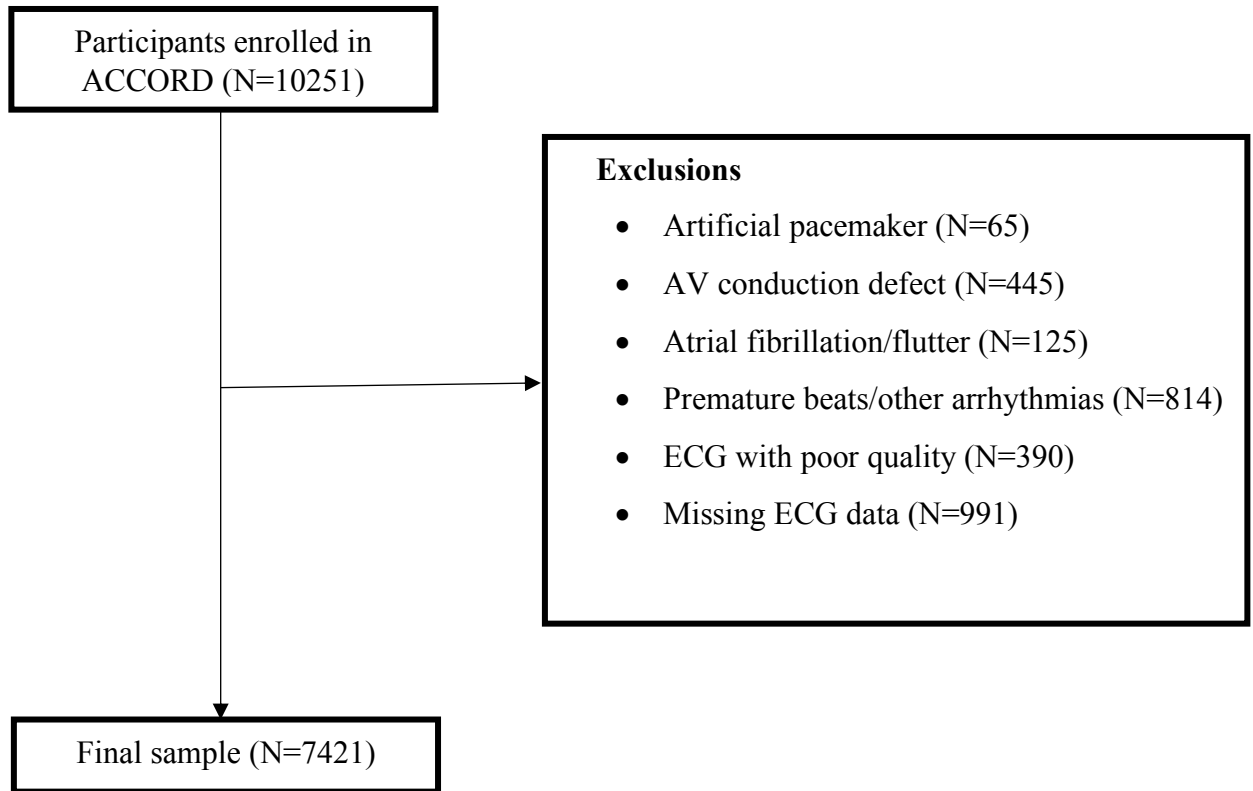

**Figure S1. Exclusion criteria for examining the association of cardiac autonomic dysfunction and incidence of severe hypoglycemia among participants enrolled in ACCORD**

ACCORD indicates Action to Control Cardiovascular Risk in Diabetes; AV, atrioventricular; ECG, electrocardiogram.

**Table S1. Comparison of Participants Excluded to Those Included in the Final Sample**

| <b>Characteristic</b>              | <b>Included</b> | <b>Excluded</b> | <b>P-value</b> |
|------------------------------------|-----------------|-----------------|----------------|
| N                                  | 7421            | 2830            | ...            |
| Age, years                         | 62.3 (6.5)      | 64.0 (7.0)      | <0.001         |
| Women, %                           | 40.9            | 32.3            | <0.001         |
| Race/ethnicity, %                  |                 |                 | 0.005          |
| <i>White</i>                       | 61.9            | 63.5            |                |
| <i>Black</i>                       | 18.8            | 19.7            |                |
| <i>Hispanic</i>                    | 7.7             | 5.8             |                |
| <i>Other</i>                       | 11.6            | 10.9            |                |
| Body mass index, kg/m <sup>2</sup> | 32.3 (5.4)      | 32.1 (5.5)      | 0.377          |
| Current smoking, %                 | 14.0            | 13.8            | 0.725          |
| Alcohol drinking, %                | 23.5            | 25.0            | 0.113          |
| Systolic BP, mm Hg                 | 136.2 (16.9)    | 136.8 (17.7)    | 0.146          |
| Diastolic BP, mm Hg                | 75.2 (10.4)     | 74.0 (11.2)     | <0.001         |
| Heart rate, bpm                    | 69.8 (10.5)     | 68.8 (13.4)     | <0.001         |
| Use of BP-lowering drug, %         | 83.0            | 85.1            | 0.012          |
| Use of beta blocker, %             | 27.7            | 36.6            | <0.001         |
| Use of CCB, %                      | 18.3            | 21.4            | <0.001         |
| Use of insulin, %                  | 34.2            | 36.8            | 0.016          |
| Use of sulfonylurea, %             | 53.9            | 52.2            | 0.134          |
| Hemoglobin A <sub>1C</sub> , %     | 8.3 (1.1)       | 8.3 (1.1)       | 0.403          |
| Duration of diabetes, years        | 9.0 (5.0-15.0)  | 10.0 (5.0-16.0) | 0.001          |
| Prevalent CVD                      | 33.0            | 41.0            | <0.001         |
| Total cholesterol, mg/dL           | 184.2 (41.5)    | 180.9 (42.7)    | <0.001         |
| HDL-cholesterol, mg/dL             | 42.0 (11.5)     | 41.6 (12.0)     | 0.142          |
| LDL-cholesterol, mg/dL             | 105.3 (33.8)    | 103.9 (34.2)    | 0.055          |
| Total/HDL-cholesterol Ratio        | 4.7 (1.7)       | 4.6 (1.6)       | 0.333          |
| eGFR, mL/min/1.73m <sup>2</sup>    | 91.9 (26.2)     | 88.8 (29.5)     | <0.001         |

Data are mean (standard deviation), median (interquartile range), or proportion (%) unless otherwise indicated. CAN was defined as SDNN < 8.2 ms and rMSSD < 8.0 ms. BP indicates blood pressure; CAN, cardiac autonomic neuropathy; CCBs, calcium channel blockers; CVD, cardiovascular disease; eGFR, estimated glomerular filtration rate; HDL, high-density lipoprotein; LDL, low-density lipoprotein; rMSSD, root mean square of successive differences between normal-to-normal R-R intervals; SDNN, standard deviation of all normal-to-normal R-R intervals.

**Table S2. Baseline Characteristics of Participants Cardiac Autonomic Neuropathy status**

| Characteristic                     | Total          | CAN Absent     | CAN Present    | P-value |
|------------------------------------|----------------|----------------|----------------|---------|
| N                                  | 7421           | 5973           | 1448           | ...     |
| Age, years                         | 62.3 (6.5)     | 62.3 (6.5)     | 62.5 (6.4)     | 0.227   |
| Women, %                           | 40.9           | 42.5           | 34.5           | <0.001  |
| Race/ethnicity, %                  |                |                |                | <0.001  |
| <i>White</i>                       | 61.9           | 60.5           | 67.6           |         |
| <i>Black</i>                       | 18.8           | 19.7           | 15.3           |         |
| <i>Hispanic</i>                    | 7.7            | 7.9            | 6.8            |         |
| <i>Other</i>                       | 11.6           | 11.8           | 10.4           |         |
| Body mass index, kg/m <sup>2</sup> | 32.3 (5.4)     | 32.2 (5.4)     | 32.6 (5.4)     | 0.010   |
| Current smoking, %                 | 14.0           | 13.5           | 16.0           | 0.014   |
| Alcohol drinking, %                | 23.5           | 24.0           | 21.4           | 0.038   |
| Systolic BP, mm Hg                 | 136.2 (16.9)   | 136.3 (17.0)   | 135.8 (16.5)   | 0.286   |
| Diastolic BP, mm Hg                | 75.2 (10.4)    | 75.2 (10.4)    | 75.2 (10.5)    | 0.978   |
| Heart rate, bpm                    | 69.8 (10.5)    | 68.1 (9.7)     | 76.8 (10.7)    | <0.001  |
| Use of BP-lowering drug, %         | 83.0           | 83.0           | 83.2           | 0.824   |
| Use of beta blocker, %             | 27.7           | 28.3           | 25.0           | 0.013   |
| Use of CCB, %                      | 18.3           | 18.3           | 18.1           | 0.845   |
| Use of insulin, %                  | 34.2           | 32.1           | 42.9           | <0.001  |
| Use of sulfonylurea, %             | 53.9           | 53.7           | 54.4           | 0.677   |
| Hemoglobin A <sub>1C</sub> , %     | 8.3 (1.1)      | 8.3 (1.0)      | 8.4 (1.1)      | <0.001  |
| Duration of diabetes, years        | 9.0 (5.0-15.0) | 9.0 (5.0-14.0) | 10.0 (6.0-7.0) | <0.001  |
| Prevalent CVD                      | 33.0           | 32.5           | 34.9           | 0.080   |
| Total cholesterol, mg/dL           | 184.2 (41.5)   | 184.2 (40.9)   | 184.6 (44.0)   | 0.721   |
| HDL-cholesterol, mg/dL             | 42.0 (11.5)    | 42.2 (11.6)    | 41.2 (11.1)    | 0.007   |
| LDL-cholesterol, mg/dL             | 105.3 (33.8)   | 105.7 (33.8)   | 103.6 (33.7)   | 0.035   |
| Total/HDL-cholesterol Ratio        | 4.7 (1.7)      | 4.6 (1.7)      | 4.8 (1.8)      | 0.023   |
| eGFR, mL/min/1.73m <sup>2</sup>    | 91.9 (26.2)    | 92.3 (26.2)    | 90.2 (25.9)    | 0.007   |

Data are mean (standard deviation), median (interquartile range), or proportion (%) unless otherwise indicated. CAN was defined as SDNN < 8.2 ms and rMSSD < 8.0 ms. BP indicates blood pressure; CAN, cardiac autonomic neuropathy; CCBs, calcium channel blockers; CVD, cardiovascular disease; eGFR, estimated glomerular filtration rate; HDL, high-density lipoprotein; LDL, low-density lipoprotein; rMSSD, root mean square of successive differences between normal-to-normal R-R intervals; SDNN, standard deviation of all normal-to-normal R-R intervals.

**Table S3. Rates and Hazard Ratios for Severe Hypoglycemic Events Requiring Any assistance by Cardiac Autonomic Neuropathy status**

|                        | First Hypoglycemic Event |                  |                | Recurrent Hypoglycemic Events |                  |                |
|------------------------|--------------------------|------------------|----------------|-------------------------------|------------------|----------------|
|                        | CAN Absent               | CAN Present      | <i>P value</i> | CAN Absent                    | CAN Present      | <i>P value</i> |
| No Events/No at risk   | 652/5973                 | 202/1448         | ...            | 1056/5973                     | 433/1448         | ...            |
| Person-years           | 26401.4                  | 6188.3           | ...            | 26720.9                       | 6354.2           | ...            |
| Rate/1000 person-years | 24.7 (22.9-26.7)         | 32.6 (28.4-37.5) | ...            | 39.5 (37.2-42.0)              | 68.1 (62.0-74.9) | ...            |
| Hazard ratio (95% CI)  |                          |                  |                |                               |                  |                |
| <i>Model 1</i>         | 1 (Reference)            | 1.33 (1.13-1.55) | <0.001         | 1 (Reference)                 | 1.77 (1.36-2.29) | <0.001         |
| <i>Model 2</i>         | 1 (Reference)            | 1.14 (0.97-1.34) | 0.110          | 1 (Reference)                 | 1.43 (1.12-1.82) | 0.004          |
| <i>Model 3</i>         | 1 (Reference)            | 1.14 (0.97-1.34) | 0.117          | 1 (Reference)                 | 1.42 (1.12-1.80) | 0.004          |
| <i>Model 4</i>         | 1 (Reference)            | 1.14 (0.97-1.34) | 0.120          | 1 (Reference)                 | 1.42 (1.12-1.80) | 0.004          |

Data are hazard ratios (95% CI) unless otherwise specified. CAN was defined as defined as SDNN < 8.2 ms and rMSSD < 8.0 ms. Model 1 adjusted for age, sex, race, and treatment arm; model 2 includes model 1 plus duration of diabetes, glycated hemoglobin, cigarette smoking, alcohol intake, body mass index, systolic blood pressure, estimated glomerular filtration rate, use of insulin or sulfonylurea, use of beta blockers, and use of calcium channel blockers; model 3 includes model 2 plus history of prevalent CVD; model 4 includes model 3 plus alanine transaminases (ALT). CAN. CAN indicates cardiac autonomic neuropathy; CVD, cardiovascular disease; rMSSD, root mean square of successive differences between normal-to-normal R-R intervals; SDNN, standard deviation of all normal-to-normal R-R intervals.

**Table S4. Rates and Hazard Ratios for Severe Hypoglycemia Requiring Any assistance by Evidence of Cardiac Autonomic Neuropathy Stratified by Intensity of Glucose Lowering**

| CAN Definition                                | First hypoglycemic event |                  |                | Recurrent hypoglycemic event |                   |                |
|-----------------------------------------------|--------------------------|------------------|----------------|------------------------------|-------------------|----------------|
|                                               | CAN Absent               | CAN Present      | <i>P value</i> | CAN Absent                   | CAN Present       | <i>P value</i> |
| <b>Standard Glycemic Management (N=3741)</b>  |                          |                  |                |                              |                   |                |
| No Events/No at risk                          | 172/3028                 | 69/713           |                | 260/3028                     | 129/713           |                |
| Person-years                                  | 14027.0                  | 3207.9           |                | 14105.3                      | 3262.8            |                |
| Rate/1000 person-years                        | 12.3 (10.6-14.2)         | 21.5 (17.0-27.2) |                | 18.4 (16.3-20.8)             | 39.5 (33.3-47.0)  |                |
| Hazard ratio (95% CI)                         |                          |                  |                |                              |                   |                |
| <i>Model 1</i>                                | 1 (Reference)            | 1.78 (1.34-2.37) | <0.001         | 1 (Reference)                | 2.21 (1.56-3.13)  | <0.001         |
| <i>Model 2</i>                                | 1 (Reference)            | 1.42 (1.06-1.91) | 0.020          | 1 (Reference)                | 1.76 (1.24-2.50)  | 0.002          |
| <i>Model 3</i>                                | 1 (Reference)            | 1.42 (1.06-1.90) | 0.020          | 1 (Reference)                | 1.75 (1.24-2.48)  | 0.002          |
| <i>Model 4</i>                                | 1 (Reference)            | 1.43 (1.07-1.92) | 0.016          | 1 (Reference)                | 1.77 (1.25-2.50)  | 0.001          |
| <b>Intensive Glycemic Management (N=3680)</b> |                          |                  |                |                              |                   |                |
| No Events/No at risk                          | 480/2945                 | 133/735          |                | 796/2945                     | 304/735           |                |
| Person-years                                  | 12374.5                  | 2980.4           |                | 12615.7                      | 3091.4            |                |
| Rate/1000 person-years                        | 38.8 (35.5-42.4)         | 44.6 (37.7-52.9) |                | 63.1 (58.9-67.6)             | 98.3 (87.9-110.0) |                |
| Hazard ratio (95% CI)                         |                          |                  |                |                              |                   |                |
| <i>Model 1</i>                                | 1 (Reference)            | 1.16 (0.96-1.41) | 0.126          | 1 (Reference)                | 1.61 (1.15-2.26)  | 0.006          |
| <i>Model 2</i>                                | 1 (Reference)            | 1.04 (0.85-1.26) | 0.733          | 1 (Reference)                | 1.31 (0.96-1.78)  | 0.084          |
| <i>Model 3</i>                                | 1 (Reference)            | 1.04 (0.85-1.26) | 0.735          | 1 (Reference)                | 1.31 (0.97-1.77)  | 0.083          |
| <i>Model 4</i>                                | 1 (Reference)            | 1.03 (0.84-1.25) | 0.788          | 1 (Reference)                | 1.30 (0.95-1.77)  | 0.099          |

Data are hazard ratios (95% CI) unless otherwise specified. CAN was defined as defined as SDNN < 8.2 ms and rMSSD < 8.0 ms. Model 1 adjusted for age, sex, race, and treatment arm; model 2 includes model 1 plus duration of diabetes, glycated hemoglobin, cigarette smoking, alcohol intake, body mass index, systolic blood pressure, estimated glomerular filtration rate, use of insulin or sulfonylurea, use of beta blockers, and use of calcium channel blockers; model 3 includes model 2 plus history of prevalent CVD. CAN indicates cardiac autonomic neuropathy; CVD, cardiovascular disease; rMSSD, root mean square of successive differences between normal-to-normal R-R intervals; SDNN, standard deviation of all normal-to-normal R-R intervals

**Table S5. Rates and Hazard Ratios for Severe Hypoglycemic Events Requiring Any assistance by Cross-Categories of Cardiac Autonomic Neuropathy Status and Glycemic Treatment Arm**

| Outcome                              | Standard Glycemic management |                  | Intensive Glycemic management |                   |
|--------------------------------------|------------------------------|------------------|-------------------------------|-------------------|
|                                      | CAN Absent                   | CAN Present      | CAN Absent                    | CAN Present       |
| <b>First Hypoglycemic Event</b>      |                              |                  |                               |                   |
| No Events/No at risk                 | 172/3028                     | 69/713           | 480/2945                      | 133/735           |
| Person-years                         | 14027.0                      | 3207.9           | 12374.5                       | 2980.4            |
| Rate/1000 person-years               | 12.3 (10.6-14.2)             | 21.5 (17.0-27.2) | 38.8 (35.5-42.4)              | 44.6 (37.7-52.9)  |
| Hazard ratio (95% CI)                |                              |                  |                               |                   |
| Model 1                              | 1 (Reference)                | 1.79 (1.35-2.37) | 3.49 (2.90-4.21)              | 4.07 (3.21-5.16)  |
| Model 2                              | 1 (Reference)                | 1.54 (1.16-2.04) | 3.51 (2.91-4.24)              | 3.56 (2.79-4.54)  |
| Model 3                              | 1 (Reference)                | 1.54 (1.16-2.04) | 3.50 (2.90-4.23)              | 3.54 (2.78-4.52)  |
| Model 4                              | 1 (Reference)                | 1.54 (1.16-2.04) | 3.50 (2.90-4.23)              | 3.52 (2.76-4.49)  |
| <b>Recurrent Hypoglycemic Events</b> |                              |                  |                               |                   |
| No Events/No at risk                 | 260/3028                     | 129/713          | 796/2945                      | 304/735           |
| Person-years                         | 14105.3                      | 3262.8           | 12615.7                       | 3091.4            |
| Rate/1000 person-years               | 18.4 (16.3-20.8)             | 39.5 (33.3-47.0) | 63.1 (58.9-67.6)              | 98.3 (87.9-110.0) |
| Hazard ratio (95% CI)                |                              |                  |                               |                   |
| Model 1                              | 1 (Reference)                | 2.23 (1.58-3.15) | 3.96 (3.12-5.02)              | 6.37 (4.34-9.35)  |
| Model 2                              | 1 (Reference)                | 1.83 (1.30-2.59) | 3.92 (3.08-4.98)              | 5.08 (3.55-7.27)  |
| Model 3                              | 1 (Reference)                | 1.83 (1.29-2.58) | 3.88 (3.06-4.93)              | 5.01 (3.52-7.14)  |
| Model 4                              | 1 (Reference)                | 1.83 (1.30-2.59) | 3.89 (3.06-4.94)              | 4.98 (3.48-7.13)  |

Data are hazard ratios (95% CI) unless otherwise specified. CAN was defined as defined as SDNN < 8.2 ms and rMSSD < 8.0 ms. Model 1 adjusted for age, sex, race, and treatment arm; model 2 includes model 1 plus duration of diabetes, glycated hemoglobin, cigarette smoking, alcohol intake, body mass index, systolic blood pressure, estimated glomerular filtration rate, use of insulin or sulfonylurea, use of beta blockers, and use of calcium channel blockers; model 3 includes model 2 plus history of prevalent CVD; model 4 includes model 3 plus alanine transaminases (ALT). CAN indicates cardiac autonomic neuropathy; CVD, cardiovascular disease; rMSSD, root mean square of successive differences between normal-to-normal R-R intervals; SDNN, standard deviation of all normal-to-normal R-R intervals.

**Table S6. Rates and Hazard Ratios for first hypoglycemic event by the use of beta-blockers status**

| CAN Definition                       | Not on beta blocker |                  |                | On beta blocker  |                  |                |
|--------------------------------------|---------------------|------------------|----------------|------------------|------------------|----------------|
|                                      | CAN Absent          | CAN Present      | <i>P value</i> | CAN Absent       | CAN Present      | <i>P value</i> |
| <b>Standard Glycemic Management</b>  |                     |                  |                |                  |                  |                |
| No Events/No at risk                 | 78/ 2,156           | 30/ 517          |                | 38/ 872          | 21/ 196          |                |
| Person-years                         | 10230.9             | 2398.9           |                | 3968.9           | 874.4            |                |
| Rate/1000 person-years               | 7.6 (6.1-9.5)       | 12.5 (8.7-17.9)  |                | 9.6 (7.0-13.2)   | 24.0 (15.7-36.8) |                |
| Hazard ratio (95% CI)                |                     |                  |                |                  |                  |                |
| <i>Model 1</i>                       | 1 (Reference)       | 1.68 (1.10-2.57) | 0.016          | 1 (Reference)    | 2.79 (1.62-4.81) | <0.001         |
| <i>Model 2</i>                       | 1 (Reference)       | 1.31 (0.85-2.03) | 0.222          | 1 (Reference)    | 2.23 (1.29-3.86) | 0.004          |
| <i>Model 3</i>                       | 1 (Reference)       | 1.31 (0.85-2.03) | 0.220          | 1 (Reference)    | 2.23 (1.28-3.86) | 0.004          |
| <i>Model 4</i>                       | 1 (Reference)       | 1.31 (0.85-2.03) | 0.225          | 1 (Reference)    | 2.35 (1.35-4.09) | 0.002          |
| <b>Intensive Glycemic Management</b> |                     |                  |                |                  |                  |                |
| No Events/No at risk                 | 200/ 2,130          | 68/ 569          |                | 102/ 815         | 21/ 166          |                |
| Person-years                         | 9474.3              | 2433.1           |                | 3484.9           | 694.3            |                |
| Rate/1000 person-years               | 21.1 (18.4-24.2)    | 27.9 (22.0-35.4) |                | 29.3 (24.1-35.5) | 30.2 (19.7-46.4) |                |
| Hazard ratio (95% CI)                |                     |                  |                |                  |                  |                |
| <i>Model 1</i>                       | 1 (Reference)       | 1.31 (0.99-1.73) | 0.057          | 1 (Reference)    | 1.05 (0.65-1.69) | 0.842          |
| <i>Model 2</i>                       | 1 (Reference)       | 1.11 (0.84-1.49) | 0.459          | 1 (Reference)    | 0.99 (0.61-1.60) | 0.959          |
| <i>Model 3</i>                       | 1 (Reference)       | 1.12 (0.84-1.49) | 0.459          | 1 (Reference)    | 0.99 (0.61-1.61) | 0.973          |
| <i>Model 4</i>                       | 1 (Reference)       | 1.11 (0.83-1.48) | 0.472          | 1 (Reference)    | 0.98 (0.61-1.59) | 0.946          |

Data are hazard ratios (95% CI) unless otherwise specified. CAN was defined as defined as SDNN < 8.2 ms and rMSSD < 8.0 ms. Model 1 adjusted for age, sex, race, and treatment arm; model 2 includes model 1 plus duration of diabetes, glycated hemoglobin, cigarette smoking, alcohol intake, body mass index, systolic blood pressure, estimated glomerular filtration rate, use of insulin or sulfonylurea, use of beta blockers, and use of calcium channel blockers; model 3 includes model 2 plus history of prevalent CVD; model 4 includes model 3 plus alanine transaminases (ALT). CAN indicates cardiac autonomic neuropathy; CVD, cardiovascular disease; rMSSD, root mean square of successive differences between normal-to-normal R-R intervals; SDNN, standard deviation of all normal-to-normal R-R intervals.

**Table S7. Rates and Hazard Ratios for recurrent hypoglycemic event by the use of beta-blockers status**

| CAN Definition                       | Not on beta blocker |                  |                | On beta blocker  |                  |                |
|--------------------------------------|---------------------|------------------|----------------|------------------|------------------|----------------|
|                                      | CAN Absent          | CAN Present      | <i>P value</i> | CAN Absent       | CAN Present      | <i>P value</i> |
| <b>Standard Glycemic Management</b>  |                     |                  |                |                  |                  |                |
| No Events/No at risk                 | 106/ 2,156          | 48/ 517          |                | 49/ 872          | 38/ 196          |                |
| Person-years                         | 10176.3             | 2394.9           |                | 3928.9           | 867.9            |                |
| Rate/1000 person-years               | 10.4 (8.6-12.6)     | 20.0 (15.1-26.6) |                | 12.5 (9.4-16.5)  | 43.8 (31.9-60.2) |                |
| Hazard ratio (95% CI)                |                     |                  |                |                  |                  |                |
| <i>Model 1</i>                       | 1 (Reference)       | 1.94 (1.18-3.20) | 0.009          | 1 (Reference)    | 4.06 (2.18-7.57) | <0.001         |
| <i>Model 2</i>                       | 1 (Reference)       | 1.51 (0.91-2.50) | 0.110          | 1 (Reference)    | 2.88 (1.57-5.25) | 0.001          |
| <i>Model 3</i>                       | 1 (Reference)       | 1.51 (0.91-2.50) | 0.110          | 1 (Reference)    | 2.87 (1.57-5.25) | 0.001          |
| <i>Model 4</i>                       | 1 (Reference)       | 1.51 (0.91-2.51) | 0.111          | 1 (Reference)    | 3.01 (1.68-5.41) | <0.001         |
| <b>Intensive Glycemic Management</b> |                     |                  |                |                  |                  |                |
| No Events/No at risk                 | 290/ 2,130          | 128/ 569         |                | 124/ 815         | 28/ 166          |                |
| Person-years                         | 9239.6              | 2402.3           |                | 3376.1           | 689.1            |                |
| Rate/1000 person-years               | 31.4 (28.0-35.2)    | 53.3 (44.8-63.4) |                | 36.7 (30.8-43.8) | 40.6 (28.1-58.8) |                |
| Hazard ratio (95% CI)                |                     |                  |                |                  |                  |                |
| <i>Model 1</i>                       | 1 (Reference)       | 1.70 (1.18-2.44) | 0.004          | 1 (Reference)    | 1.16 (0.69-1.94) | 0.573          |
| <i>Model 2</i>                       | 1 (Reference)       | 1.23 (0.88-1.72) | 0.217          | 1 (Reference)    | 1.11 (0.66-1.87) | 0.696          |
| <i>Model 3</i>                       | 1 (Reference)       | 1.23 (0.88-1.72) | 0.219          | 1 (Reference)    | 1.11 (0.66-1.87) | 0.684          |
| <i>Model 4</i>                       | 1 (Reference)       | 1.23 (0.89-1.72) | 0.215          | 1 (Reference)    | 1.11 (0.66-1.86) | 0.695          |

Data are hazard ratios (95% CI) unless otherwise specified. CAN was defined as defined as SDNN < 8.2 ms and rMSSD < 8.0 ms. Model 1 adjusted for age, sex, race, and treatment arm; model 2 includes model 1 plus duration of diabetes, glycosylated hemoglobin, cigarette smoking, alcohol intake, body mass index, systolic blood pressure, estimated glomerular filtration rate, use of insulin or sulfonylurea, use of beta blockers, and use of calcium channel blockers; model 3 includes model 2 plus history of prevalent CVD; model 4 includes model 3 plus alanine transaminases (ALT). CAN indicates cardiac autonomic neuropathy; CVD, cardiovascular disease; rMSSD, root mean square of successive differences between normal-to-normal R-R intervals; SDNN, standard deviation of all normal-to-normal R-R intervals

**Table S8. Effect of change in cardiac autonomic neuropathy (from baseline to 48-months) on the risk of severe hypoglycemic events. (N = 4,111)**

| CAN Definition                                  | First hypoglycemic event |                   |                  | Recurrent hypoglycemic event |                   |                  |
|-------------------------------------------------|--------------------------|-------------------|------------------|------------------------------|-------------------|------------------|
|                                                 | No CAN                   | Progressed to CAN | CAN stable       | No CAN                       | Progressed to CAN | CAN stable       |
| <b>Standard Glycemic Management (N= 2,059)</b>  |                          |                   |                  |                              |                   |                  |
| Hazard ratio (95% CI)                           |                          |                   |                  |                              |                   |                  |
| <i>Model 1</i>                                  | 1 (Reference)            | 1.22 (0.65-2.29)  | 1.75 (1.08-2.81) | 1 (Reference)                | 1.15 (0.59-2.22)  | 2.16 (1.26-3.69) |
| <i>Model 2</i>                                  | 1 (Reference)            | 1.21 (0.64-2.28)  | 1.41 (0.87-2.30) | 1 (Reference)                | 1.08 (0.56-2.09)  | 1.70 (0.98-2.95) |
| <i>Model 3</i>                                  | 1 (Reference)            | 1.21 (0.64-2.29)  | 1.41 (0.87-2.30) | 1 (Reference)                | 1.08 (0.56-2.09)  | 1.70 (0.98-2.96) |
| <i>Model 3 + ALT</i>                            | 1 (Reference)            | 1.21 (0.64-2.28)  | 1.42 (0.87-2.31) | 1 (Reference)                | 1.08 (0.56-2.07)  | 1.71 (0.98-2.97) |
| <b>Intensive Glycemic Management (N= 2,052)</b> |                          |                   |                  |                              |                   |                  |
| Hazard ratio (95% CI)                           |                          |                   |                  |                              |                   |                  |
| <i>Model 1</i>                                  | 1 (Reference)            | 1.13 (0.75-1.70)  | 1.15 (0.84-1.59) | 1 (Reference)                | 1.06 (0.65-1.71)  | 1.37 (0.89-2.11) |
| <i>Model 2</i>                                  | 1 (Reference)            | 1.10 (0.72-1.67)  | 1.06 (0.76-1.48) | 1 (Reference)                | 1.01 (0.62-1.64)  | 1.05 (0.72-1.55) |
| <i>Model 3</i>                                  | 1 (Reference)            | 1.10 (0.72-1.67)  | 1.05 (0.76-1.47) | 1 (Reference)                | 1.01 (0.62-1.64)  | 1.05 (0.71-1.54) |
| <i>Model 3 + ALT</i>                            | 1 (Reference)            | 1.07 (0.71-1.63)  | 1.02 (0.73-1.42) | 1 (Reference)                | 0.99 (0.61-1.60)  | 1.01 (0.69-1.49) |

Data are hazard ratios (95% CI) unless otherwise specified. CAN was defined as defined as SDNN < 8.2 ms and rMSSD < 8.0 ms. Model 1 adjusted for age, sex, race, and treatment arm; model 2 includes model 1 plus duration of diabetes, glycosylated hemoglobin, cigarette smoking, alcohol intake, body mass index, systolic blood pressure, estimated glomerular filtration rate, use of insulin or sulfonylurea, use of beta blockers, and use of calcium channel blockers; model 3 includes model 2 plus history of prevalent CVD. CAN indicates cardiac autonomic neuropathy; CVD, cardiovascular disease; rMSSD, root mean square of successive differences between normal-to-normal R-R intervals; SDNN, standard deviation of all normal-to-normal R-R intervals

***Clinical center networks (CCNs) and clinical sites:***

*Canadian CCN:* Population Health Research Institute, Hamilton General Hospital, Canadian Diabetes Outcome Researchers (CANDOR Network), Hamilton, Ontario, Canada.

*Canadian clinical sites*

McMaster Medical Centre, Hamilton, Ontario,  
Canada, Six Nations Health Services, Ohsweken, Ontario, Canada  
Diabetes, Hypertension and Cholesterol Centre, University of Calgary, Calgary, Alberta, Canada,  
Memorial University of Newfoundland, St. John's, Newfoundland, Canada, University of  
Alberta, Edmonton, Alberta, Canada,  
Centre de Recherche Clinique de Laval, Laval, Quebec, Canada  
St. Joseph's Health Care London, London, Ontario, Canada  
Ottawa Hospital, Division of Endocrinology and Metabolism, Ottawa, Ontario, Canada  
Royal Victoria Hospital, Montreal, Quebec, Canada  
St. Michael's Hospital Health Centre, Toronto, Ontario, Canada  
Vancouver General Hospital, Vancouver, British Columbia, Canada  
Diabetes Research Group, Winnipeg, Manitoba, Canada  
Queen Elizabeth II Health Sciences Centre, Halifax, Nova Scotia, Canada

*Western CCN:* University of Washington, Seattle, WA:

*Western clinical sites:*

Northridge Hospital Medical Center, Cardiovascular Center, Northridge, CA  
White Memorial Medical Center, Clinical Hypertension Services, Los Angeles, CA  
University of Washington Medical Center at Roosevelt, Family Medical Center, Seattle, WA  
Idaho State University, Department of Family Medicine, Pocatello, ID  
Naval Medical Center San Diego, Cardiology Division, San Diego, CA  
Oregon Health & Science University, Section of Diabetes, Portland, OR  
Washington State University, Spokane, WA  
Kaiser Endocrine Clinic, San Diego, CA  
Whittier Institute for Diabetes, Clinical Trials Department, La Jolla, CA

*Minnesota-Iowa CCN:* Berman Center for Outcomes & Clinical Research, Minneapolis, MN

*Minnesota-Iowa clinical sites:*

Hennepin ACCORD Clinic, Minneapolis, MN  
International Diabetes Center at Park Nicollet, St. Louis Park, MN  
Ellie Strock. University of Minnesota, Minneapolis, MN  
University of Minnesota, Phalen Village Clinic, St. Paul, MN  
Riverside Health Partners Clinic, Department of Endocrinology, Minneapolis, MN  
University of Iowa, Health Care Diabetes Clinical Research and Programs, Iowa City, IA

*Ohio-Michigan CCN:* Case Western Reserve University, Division of Clinical and Molecular Endocrinology, Cleveland, OH

*Ohio-Michigan clinical sites:*

University Hospitals of Cleveland, Division of Endocrinology, and University Hospitals Weslake Medical, Cleveland, OH  
St. Vincent Charity Hospital, Lipid Research Center, Cleveland, OH  
University Suburban Health Center, South Euclid, OH

Cleveland Veterans Affairs (VA) Medical Center (VAMC), Department of Medicine, and  
Ravenna Community Based Outpatient Clinic, Cleveland,  
The Cleveland Clinic Foundation and Lakewood Hospital Professional Building, Cleveland, OH  
Your Diabetes Endocrine Nutrition Group, Mentor, OH  
Medical University of Ohio, Department of Medicine, Ruppert Health Center, Toledo, OH  
The Ohio State University Medical Center, Division of Endocrinology, Diabetes and  
Metabolism, Columbus, OH  
University of Cincinnati/VA Medical Center, Research Service, Cincinnati, OH  
Henry Ford Health System–New Center One, Detroit, MI  
Grunberger Diabetes Institute, Bloomfield Hills, M

*Northeastern CCN:* Columbia University College of Physicians and Surgeons, New York, NY  
*Northeastern clinical sites:*

Jacobi Medical Center, Bronx, NY  
Albert Einstein General Clinical Research Center, Bronx, NY  
Cornell Internal Medicine Associates, New York, NY  
The Diabetes Care and Information Center of New York, Flushing, NY  
The Cooper Health System, Pennsville, NJ  
Great Lakes Medical Clinic Research, Westfield, NY  
Ambulatory Care Network at Columbia University, New York, NY  
Irving Diabetes Research Unit, New York, NY  
State University of New York Downstate Medical Center, Brooklyn, NY  
Kings County, Brooklyn, NY  
Cooper Clinical Trials Center, The Cooper Health System, Camden, NJ

*Southeastern CCN:* Wake Forest University School of Medicine, Department of Public Health  
Sciences, Winston-Salem

*Southeastern clinical sites:*

Duke University Medical Center, Durham, NC  
Constant Care, Inc., Valdosta, GA  
Wake Forest University School of Medicine, Department of Geriatrics/Gerontology, Winston-  
Salem, NC  
Downtown Health Plaza, Winston-Salem, NC  
University of North Carolina, Diabetes Care Center, Chapel Hill, NC  
Holston Medical Group, Kingsport, TN  
Carolinas Medical Center Family Practice, Charlotte, NC  
Robeson Health Care Corporation, Fairmont Clinic, Fairmont, NC  
Wake Forest University School of Medicine, Departments of Internal Medicine and  
Endocrinology, Winston-Salem, NC  
Tulane University Health Science Center, New Orleans, LA  
Kaiser Permanente, Clinic Atlanta Crescent Medical Center, Tucker, GA

*VA CCN:* Memphis VAMC, Memphis, TN

*VA clinical sites:*

Memphis VAMC, Hypertension/Lipid Research Clinic, Memphis, TN  
Atlanta VAMC Medical Service, Decatur, GA

Johnson VAMC, Primary Care, Charleston, SC  
Rehman. G. V. (Sonny) Montgomery VAMC, Research Department, Jackson, MS  
VA NY Harbor Healthcare System, New York, NY  
Washington VAMC, Washington, DC  
St. Louis VAMC, St. Louis, MO  
Central Arkansas Clinic Healthcare System, Little Rock, AR
